# Supplementary material for: Seasonal and spatial variability in chemical composition and mass closure of ambient ultrafine particles in the megacity of Los Angeles
Source: Royal Society of Chemistry journal article supplement (doi:10.1039/c2em30615h), 2012-11-28
Supplement: c2em30615h.pdf [file c2em30615h.pdf]

## Supplementary Information

**Table S1. Select meteorological parameters at sites clusters during spring (March-May), summer (June-August), fall (September-November) and winter (December-February). \*Data corresponds to December.**

|                        |        | Temperature (°C)<br>Average±stdev | Relative humidity (%)<br>Average±stdev | Precipitation (mm)<br>Total | Wind (vector-average) |                      |
|------------------------|--------|-----------------------------------|----------------------------------------|-----------------------------|-----------------------|----------------------|
|                        |        |                                   |                                        |                             | Speed (m/s) (calm%)   | Prevailing direction |
| Long Beach             | Spring | 16.3±5                            | 65.2±23.6                              | 12.0                        | 1.6(4.1)              | SW                   |
|                        | Summer | 21.3±3.8                          | 76.8±17.7                              | 0.7                         | 1.9(3.3)              | SW                   |
|                        | Fall   | 19.9±4.9                          | 67.8±28.7                              | 54.8                        | 1.2(5.6)              | W                    |
|                        | Winter | 13.8±5                            | 61.6±29.8                              | 168.9                       | 0.7(2.9)              | NW                   |
| Western LA             | Spring | 15±4.4                            | 69±18.5                                | 10.9                        | 1.7(9.8)              | W                    |
|                        | Summer | 19.4±2.7                          | 81±7.9                                 | 1.5                         | 0.7(26.2)             | W                    |
|                        | Fall   | 19±4.2                            | 65.3±24.3                              | 98.0                        | 0.2(50.2)             | NE                   |
|                        | Winter | 13.9±4.8                          | 58.3±26.1                              | 215.8                       | 0.2(26.2)             | NW                   |
| Central and Eastern LA | Spring | 17.2±5.8                          | 59±18.4                                | 9.7                         | 2.1(0.6)              | SW                   |
|                        | Summer | 22.8±4.8                          | 66.7±13.7                              | 0.0                         | 3.6(1.2)              | SW                   |
|                        | Fall   | 20.9±5.7                          | 55.5±21.4                              | 184.9                       | 1.6(4.6)              | SW                   |
|                        | Winter | 14.1±5.6                          | 55.6±21.4                              | 182.6*                      | 1.5(0.6)              | NE                   |
| Riverside              | Spring | 17.4±6.7                          | 63.4±26.8                              | 1.8                         | 2.6(5)                | NW                   |
|                        | Summer | 25.6±6.4                          | 65±23                                  | 5.6                         | 3.6(2.7)              | W                    |
|                        | Fall   | 22±7.1                            | 56.8±28.1                              | 1.5                         | 1.6(6.5)              | NW                   |
|                        | Winter | 13.8±6.1                          | 61.8±31.5                              | 78.5                        | 1.3(3.9)              | N                    |
| Lancaster              | Spring | 15.2±6.6                          | 40.5±16.7                              | NA                          | 4.1(13.5)             | W                    |
|                        | Summer | 27.9±5.4                          | 26.9±9.3                               | NA                          | 4.3(11.6)             | W                    |
|                        | Fall   | 18.8±7.3                          | 36.5±17.7                              | NA                          | 1.5(30.5)             | W                    |
|                        | Winter | 8.7±4.7                           | 55.9±19.7                              | NA                          | 1.5(33.6)             | W                    |

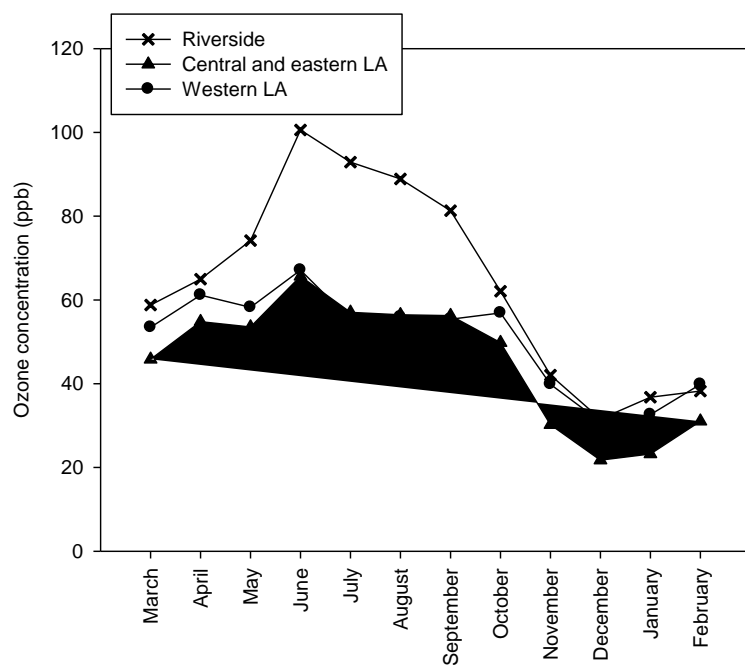

**Figure S1- Mean peak levels of ozone in Riverside, central and eastern LA as well as western LA. Data acquired from the online database of the California Air Resources Board.**

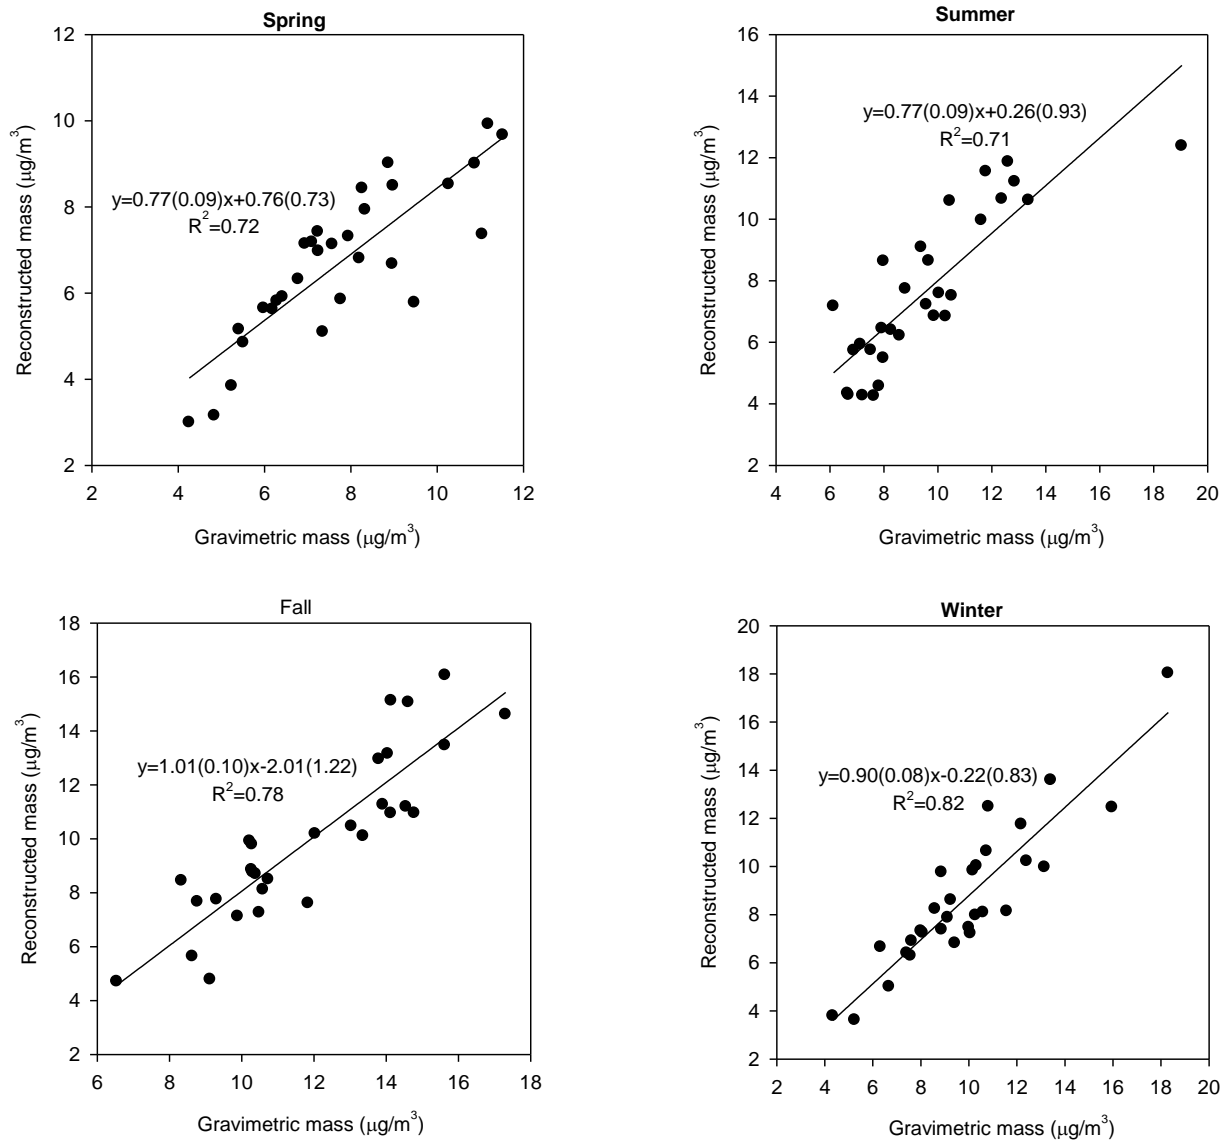

**Figure S2a-d.** Linear regression plot of monthly reconstructed and gravimetric mass concentrations in a) spring, b) summer, c) fall and d) winter.

**Table S2. Principal component loadings (VARIMAX normalized) of select metal and trace elements in quasi-UFP ( $d_p < 0.25 \mu\text{m}$ ) at individual sampling sites.**

| HUD           |             |             |             | GRD           |             |             |             | LDS         |               |             |             |             | CCL         |             |               |             | USC         |             |             |               |             |             |             |             |
|---------------|-------------|-------------|-------------|---------------|-------------|-------------|-------------|-------------|---------------|-------------|-------------|-------------|-------------|-------------|---------------|-------------|-------------|-------------|-------------|---------------|-------------|-------------|-------------|-------------|
|               | PC1         | PC2         | PC3         |               | PC1         | PC2         | PC3         | PC4         |               | PC1         | PC2         | PC3         | PC4         | PC5         |               | PC1         | PC2         | PC3         | PC4         |               | PC1         | PC2         | PC3         | PC4         |
| Li            | <b>0.97</b> | 0.14        | -0.09       | Li            | <b>0.87</b> | 0.38        | -0.01       | 0.23        | Li            | <b>0.89</b> | -0.16       | 0.20        | 0.22        | -0.05       | Li            | <b>0.71</b> | 0.39        | 0.30        | 0.38        | Li            | <b>0.94</b> | 0.17        | 0.07        | 0.04        |
| Na            | <b>0.88</b> | 0.29        | 0.15        | Na            | <b>0.81</b> | 0.25        | 0.45        | 0.09        | Na            | 0.38        | <b>0.81</b> | 0.03        | 0.28        | -0.01       | Na            | 0.34        | 0.15        | <b>0.84</b> | 0.32        | Na            | 0.58        | 0.17        | 0.46        | 0.46        |
| Mg            | <b>0.99</b> | 0.09        | 0.03        | Mg            | <b>0.74</b> | 0.47        | 0.28        | 0.38        | Mg            | <b>0.82</b> | 0.31        | 0.41        | 0.19        | 0.07        | Mg            | <b>0.75</b> | 0.39        | 0.47        | 0.17        | Mg            | <b>0.94</b> | 0.16        | -0.10       | 0.21        |
| Al            | <b>0.99</b> | 0.08        | 0.12        | Al            | <b>0.74</b> | 0.47        | 0.36        | 0.24        | Al            | 0.57        | 0.60        | 0.29        | 0.40        | -0.03       | Al            | 0.62        | 0.56        | 0.41        | 0.29        | Al            | <b>0.87</b> | 0.16        | -0.17       | 0.37        |
| S             | -0.51       | 0.50        | <b>0.53</b> | S             | -0.10       | -0.17       | <b>0.95</b> | -0.09       | S             | -0.57       | <b>0.76</b> | 0.07        | 0.07        | -0.02       | S             | -0.23       | -0.05       | -0.01       | <b>0.90</b> | S             | -0.21       | <b>0.95</b> | 0.07        | 0.12        |
| K             | <b>0.95</b> | 0.18        | 0.14        | K             | 0.52        | <b>0.74</b> | 0.30        | 0.26        | K             | <b>0.82</b> | 0.23        | 0.49        | -0.10       | 0.11        | K             | <b>0.87</b> | 0.17        | 0.34        | 0.25        | K             | <b>0.97</b> | 0.16        | -0.06       | 0.01        |
| Ca            | <b>0.98</b> | 0.13        | 0.05        | Ca            | <b>0.78</b> | 0.55        | 0.18        | 0.21        | Ca            | <b>0.88</b> | 0.20        | 0.32        | 0.20        | 0.08        | Ca            | <b>0.81</b> | 0.38        | 0.39        | 0.18        | Ca            | <b>0.98</b> | 0.09        | -0.02       | 0.17        |
| Ti            | <b>0.99</b> | 0.02        | 0.02        | Ti            | <b>0.84</b> | 0.52        | 0.03        | 0.17        | Ti            | <b>0.95</b> | 0.11        | 0.06        | 0.22        | 0.08        | Ti            | <b>0.73</b> | 0.53        | 0.40        | 0.13        | Ti            | <b>0.93</b> | -0.04       | -0.15       | 0.26        |
| V             | -0.09       | 0.06        | <b>0.91</b> | V             | -0.08       | -0.07       | <b>0.84</b> | 0.46        | V             | -0.40       | 0.35        | <b>0.77</b> | 0.14        | -0.15       | V             | -0.03       | -0.25       | 0.05        | <b>0.93</b> | V             | 0.12        | <b>0.90</b> | 0.12        | 0.21        |
| Cr            | <b>0.79</b> | 0.12        | 0.30        | Cr            | <b>0.92</b> | 0.18        | -0.31       | -0.04       | Cr            | 0.38        | 0.02        | -0.18       | <b>0.89</b> | 0.00        | Cr            | 0.21        | <b>0.79</b> | 0.07        | 0.13        | Cr            | -0.27       | 0.09        | <b>0.95</b> | 0.05        |
| Mn            | <b>0.98</b> | 0.14        | 0.06        | Mn            | <b>0.80</b> | 0.56        | -0.03       | 0.22        | Mn            | <b>0.91</b> | 0.02        | 0.10        | 0.31        | 0.20        | Mn            | <b>0.75</b> | 0.47        | 0.44        | 0.09        | Mn            | <b>0.97</b> | 0.04        | 0.05        | 0.14        |
| Fe            | <b>0.98</b> | 0.12        | 0.07        | Fe            | <b>0.78</b> | 0.59        | -0.08       | 0.16        | Fe            | <b>0.95</b> | 0.00        | 0.04        | 0.24        | 0.19        | Fe            | <b>0.80</b> | 0.48        | 0.34        | -0.03       | Fe            | <b>0.97</b> | -0.04       | 0.13        | 0.10        |
| Co            | 0.52        | 0.67        | 0.22        | Co            | <b>0.83</b> | 0.24        | 0.30        | 0.30        | Co            | 0.68        | 0.24        | -0.04       | 0.56        | 0.36        | Co            | 0.54        | 0.56        | 0.37        | 0.40        | Co            | <b>0.72</b> | 0.30        | -0.05       | 0.36        |
| Ni            | 0.45        | 0.14        | <b>0.80</b> | Ni            | <b>0.74</b> | 0.25        | 0.49        | 0.37        | Ni            | 0.18        | 0.36        | 0.19        | <b>0.88</b> | 0.01        | Ni            | 0.26        | 0.44        | 0.14        | <b>0.79</b> | Ni            | -0.22       | 0.24        | <b>0.93</b> | -0.02       |
| Cu            | 0.69        | -0.15       | 0.44        | Cu            | <b>0.77</b> | 0.61        | -0.08       | 0.06        | Cu            | <b>0.94</b> | 0.03        | -0.03       | 0.16        | 0.19        | Cu            | 0.42        | <b>0.81</b> | 0.16        | -0.29       | Cu            | 0.10        | 0.18        | -0.37       | <b>0.79</b> |
| Zn            | 0.58        | 0.62        | 0.11        | Zn            | 0.44        | <b>0.86</b> | 0.14        | 0.04        | Zn            | 0.60        | 0.69        | 0.34        | -0.05       | -0.07       | Zn            | <b>0.82</b> | 0.25        | 0.16        | 0.45        | Zn            | <b>0.92</b> | 0.29        | 0.03        | -0.11       |
| As            | <b>0.79</b> | 0.22        | -0.22       | As            | 0.41        | 0.34        | 0.06        | <b>0.82</b> | As            | 0.31        | -0.10       | <b>0.82</b> | 0.02        | 0.30        | As            | 0.39        | 0.19        | <b>0.75</b> | 0.22        | As            | 0.67        | -0.29       | 0.09        | 0.30        |
| Rb            | <b>0.99</b> | 0.05        | 0.08        | Rb            | <b>0.74</b> | 0.57        | 0.10        | 0.34        | Rb            | <b>0.76</b> | -0.05       | <b>0.33</b> | 0.05        | 0.55        | Rb            | <b>0.83</b> | 0.30        | 0.40        | 0.15        | Rb            | <b>0.95</b> | 0.14        | -0.11       | 0.22        |
| Sr            | <b>0.99</b> | 0.09        | -0.01       | Sr            | 0.22        | <b>0.88</b> | -0.24       | 0.03        | Sr            | <b>0.90</b> | 0.03        | 0.09        | 0.21        | -0.01       | Sr            | <b>0.80</b> | 0.35        | 0.44        | 0.06        | Sr            | <b>0.90</b> | 0.02        | -0.09       | -0.08       |
| Y             | <b>0.96</b> | 0.09        | -0.03       | Y             | <b>0.76</b> | 0.53        | 0.13        | 0.34        | Y             | <b>0.89</b> | 0.10        | 0.03        | 0.28        | 0.17        | Y             | 0.50        | 0.68        | 0.26        | -0.06       | Y             | <b>0.94</b> | -0.13       | -0.01       | 0.24        |
| Nb            | <b>0.97</b> | 0.10        | 0.17        | Nb            | <b>0.88</b> | 0.43        | 0.00        | -0.02       | Nb            | <b>0.97</b> | 0.02        | -0.03       | 0.15        | 0.10        | Nb            | <b>0.74</b> | 0.53        | 0.37        | 0.03        | Nb            | <b>0.87</b> | -0.19       | -0.03       | 0.31        |
| Mo            | <b>0.93</b> | 0.10        | 0.22        | Mo            | <b>0.72</b> | 0.63        | -0.12       | 0.13        | Mo            | <b>0.90</b> | -0.14       | 0.10        | 0.24        | 0.24        | Mo            | <b>0.84</b> | 0.39        | 0.20        | 0.01        | Mo            | 0.30        | -0.03       | <b>0.84</b> | -0.34       |
| Cd            | <b>0.78</b> | 0.35        | 0.07        | Cd            | 0.41        | <b>0.84</b> | 0.22        | 0.25        | Cd            | 0.61        | 0.22        | <b>0.70</b> | -0.20       | 0.12        | Cd            | <b>0.94</b> | 0.07        | 0.15        | 0.11        | Cd            | <b>0.90</b> | 0.38        | 0.05        | -0.12       |
| Sb            | <b>0.98</b> | 0.02        | 0.04        | Sb            | <b>0.76</b> | 0.60        | -0.08       | 0.22        | Sb            | <b>0.96</b> | -0.09       | 0.07        | 0.12        | 0.22        | Sb            | 0.41        | 0.09        | <b>0.82</b> | -0.17       | Sb            | <b>0.98</b> | -0.09       | 0.01        | 0.01        |
| Cs            | <b>0.98</b> | 0.00        | -0.01       | Cs            | <b>0.85</b> | 0.32        | 0.03        | 0.38        | Cs            | <b>0.78</b> | -0.06       | 0.31        | 0.43        | 0.19        | Cs            | 0.60        | 0.37        | 0.67        | 0.00        | Cs            | 0.50        | 0.26        | 0.09        | <b>0.70</b> |
| Ba            | <b>0.97</b> | 0.18        | 0.01        | Ba            | <b>0.78</b> | 0.62        | -0.07       | 0.10        | Ba            | <b>0.98</b> | -0.02       | 0.04        | 0.08        | 0.18        | Ba            | <b>0.84</b> | 0.39        | 0.26        | -0.09       | Ba            | <b>0.99</b> | -0.13       | 0.03        | 0.02        |
| La            | 0.01        | <b>0.91</b> | 0.03        | La            | 0.16        | 0.33        | <b>0.91</b> | -0.06       | La            | -0.32       | <b>0.90</b> | 0.02        | 0.07        | 0.09        | La            | 0.49        | 0.02        | 0.05        | <b>0.83</b> | La            | 0.50        | <b>0.82</b> | 0.19        | -0.08       |
| Ce            | <b>0.98</b> | 0.19        | 0.01        | Ce            | 0.59        | <b>0.76</b> | 0.10        | 0.23        | Ce            | <b>0.87</b> | 0.31        | 0.25        | 0.12        | 0.26        | Ce            | <b>0.92</b> | 0.15        | 0.20        | 0.17        | Ce            | <b>0.98</b> | 0.15        | -0.01       | 0.03        |
| Pr            | <b>0.98</b> | 0.09        | 0.12        | Pr            | 0.59        | 0.69        | 0.17        | 0.33        | Pr            | <b>0.88</b> | 0.17        | 0.32        | 0.12        | 0.27        | Pr            | <b>0.86</b> | -0.01       | 0.18        | 0.04        | Pr            | <b>0.95</b> | 0.13        | -0.10       | 0.21        |
| Nd            | <b>0.98</b> | 0.09        | 0.07        | Nd            | 0.66        | 0.67        | 0.14        | 0.29        | Nd            | <b>0.87</b> | 0.17        | 0.25        | 0.19        | 0.31        | Nd            | <b>0.86</b> | 0.32        | 0.36        | 0.15        | Nd            | <b>0.94</b> | 0.14        | -0.12       | 0.23        |
| Sm            | <b>0.90</b> | 0.33        | 0.19        | Sm            | <b>0.70</b> | 0.53        | 0.43        | -0.06       | Sm            | 0.56        | 0.55        | 0.12        | 0.25        | 0.53        | Sm            | 0.65        | 0.18        | 0.30        | 0.62        | Sm            | <b>0.88</b> | 0.36        | -0.04       | 0.25        |
| Eu            | <b>0.98</b> | 0.14        | 0.02        | Eu            | <b>0.72</b> | 0.64        | 0.00        | 0.24        | Eu            | <b>0.95</b> | -0.04       | -0.01       | 0.10        | 0.28        | Eu            | <b>0.83</b> | 0.43        | 0.30        | -0.10       | Eu            | <b>0.98</b> | -0.13       | -0.04       | 0.08        |
| Dy            | <b>0.98</b> | 0.10        | 0.09        | Dy            | <b>0.76</b> | 0.50        | 0.09        | 0.38        | Dy            | 0.69        | 0.15        | 0.37        | 0.20        | 0.43        | Dy            | 0.69        | 0.42        | 0.48        | 0.22        | Dy            | <b>0.93</b> | 0.10        | -0.07       | 0.25        |
| Ho            | <b>0.97</b> | -0.02       | 0.06        | Ho            | <b>0.78</b> | 0.56        | 0.17        | 0.08        | Ho            | 0.63        | -0.06       | 0.10        | -0.07       | <b>0.71</b> | Ho            | <b>0.78</b> | 0.38        | 0.23        | 0.13        | Ho            | <b>0.84</b> | -0.02       | -0.04       | 0.42        |
| Pb            | <b>0.98</b> | 0.06        | 0.14        | Pb            | 0.67        | 0.66        | 0.15        | 0.29        | Pb            | <b>0.71</b> | 0.14        | 0.18        | 0.09        | 0.38        | Pb            | <b>0.74</b> | 0.39        | 0.34        | -0.20       | Pb            | <b>0.97</b> | -0.02       | -0.04       | -0.08       |
| Eigenvalue    | 27.646      | 1.601       | 2.658       | Eigenvalue    | 27.72       | 1.52        | 3.62        | 1.10        | Eigenvalue    | 23.75       | 4.36        | 1.33        | 2.54        | 1.06        | Eigenvalue    | 25.01       | 1.59        | 1.43        | 4.05        | Eigenvalue    | 24.24       | 3.72        | 2.84        | 1.63        |
| % of variance | 76.849      | 7.503       | 6.806       | % of variance | 47.80       | 30.45       | 11.16       | 7.58        | % of variance | 57.88       | 11.50       | 9.33        | 9.00        | 6.71        | % of variance | 46.94       | 16.41       | 15.14       | 13.18       | % of variance | 66.50       | 9.78        | 8.70        | 7.69        |

| HMS           |             |             |             |             | FRE           |             | VBR         |               |             |             |             | GRA         |       |               |             |             | LAN         |             |       |               |             |             |             |             |       |
|---------------|-------------|-------------|-------------|-------------|---------------|-------------|-------------|---------------|-------------|-------------|-------------|-------------|-------|---------------|-------------|-------------|-------------|-------------|-------|---------------|-------------|-------------|-------------|-------------|-------|
|               | PC1         | PC2         | PC3         | PC4         |               | PC1         | PC2         |               | PC1         | PC2         | PC3         | PC4         | PC5   |               | PC1         | PC2         | PC3         | PC4         | PC5   |               | PC1         | PC2         | PC3         | PC4         | PC5   |
| Li            | <b>0.88</b> | 0.30        | 0.17        | 0.25        | Li            | <b>0.99</b> | 0.07        | Li            | <b>0.84</b> | 0.19        | 0.42        | -0.03       | -0.25 | Li            | <b>0.72</b> | -0.05       | 0.27        | 0.41        | 0.41  | Li            | <b>0.90</b> | 0.35        | 0.01        | -0.13       | 0.13  |
| Na            | <b>0.72</b> | 0.27        | 0.53        | 0.33        | Na            | <b>0.89</b> | 0.39        | Na            | 0.65        | 0.64        | 0.12        | 0.36        | -0.02 | Na            | 0.12        | <b>0.86</b> | 0.26        | 0.24        | -0.18 | Na            | 0.58        | <b>0.74</b> | -0.12       | 0.19        | 0.13  |
| Mg            | <b>0.92</b> | 0.19        | 0.27        | 0.16        | Mg            | <b>0.98</b> | 0.08        | Mg            | <b>0.93</b> | 0.25        | 0.11        | 0.20        | 0.09  | Mg            | <b>0.76</b> | 0.56        | 0.01        | 0.00        | -0.19 | Mg            | <b>0.91</b> | 0.33        | -0.04       | 0.17        | 0.03  |
| Al            | <b>0.85</b> | 0.30        | 0.36        | 0.17        | Al            | <b>0.97</b> | 0.16        | Al            | <b>0.92</b> | 0.24        | 0.14        | 0.17        | 0.16  | Al            | <b>0.91</b> | 0.33        | 0.14        | 0.04        | 0.03  | Al            | <b>0.95</b> | 0.20        | 0.07        | 0.15        | -0.07 |
| S             | -0.09       | -0.01       | <b>0.98</b> | 0.05        | S             | 0.07        | <b>0.97</b> | S             | 0.27        | -0.01       | -0.02       | <b>0.89</b> | -0.24 | S             | -0.09       | <b>0.94</b> | -0.11       | -0.16       | -0.03 | S             | 0.29        | <b>0.88</b> | -0.22       | 0.18        | -0.09 |
| K             | <b>0.97</b> | 0.13        | 0.16        | -0.05       | K             | <b>0.92</b> | 0.22        | K             | <b>0.87</b> | 0.40        | 0.09        | 0.18        | 0.10  | K             | <b>0.71</b> | 0.61        | -0.03       | 0.14        | 0.17  | K             | <b>0.77</b> | 0.46        | 0.06        | -0.08       | 0.36  |
| Ca            | <b>0.94</b> | 0.25        | 0.11        | 0.09        | Ca            | <b>0.98</b> | 0.07        | Ca            | <b>0.91</b> | 0.34        | 0.08        | 0.08        | 0.21  | Ca            | <b>0.95</b> | -0.06       | 0.10        | 0.00        | 0.06  | Ca            | <b>0.94</b> | 0.18        | -0.02       | 0.11        | 0.04  |
| Ti            | <b>0.88</b> | 0.44        | 0.10        | 0.10        | Ti            | <b>0.95</b> | 0.17        | Ti            | <b>0.87</b> | 0.30        | 0.11        | 0.15        | 0.31  | Ti            | <b>0.89</b> | 0.10        | 0.19        | 0.20        | 0.19  | Ti            | <b>0.84</b> | 0.41        | 0.06        | -0.09       | 0.31  |
| V             | -0.13       | -0.56       | <b>0.77</b> | -0.15       | V             | -0.28       | <b>0.92</b> | V             | -0.02       | 0.09        | -0.14       | <b>0.93</b> | -0.03 | V             | -0.05       | <b>0.91</b> | -0.03       | -0.07       | 0.31  | V             | 0.56        | <b>0.73</b> | -0.28       | 0.00        | 0.06  |
| Cr            | 0.57        | <b>0.78</b> | 0.00        | -0.02       | Cr            | <b>0.90</b> | -0.13       | Cr            | 0.42        | <b>0.90</b> | 0.08        | -0.05       | 0.03  | Cr            | 0.15        | -0.21       | <b>0.90</b> | 0.28        | 0.00  | Cr            | 0.47        | 0.59        | 0.47        | -0.05       | -0.02 |
| Mn            | <b>0.84</b> | 0.49        | 0.14        | 0.05        | Mn            | <b>0.99</b> | 0.05        | Mn            | <b>0.88</b> | 0.24        | 0.14        | 0.11        | 0.32  | Mn            | <b>0.87</b> | 0.13        | 0.12        | -0.04       | 0.35  | Mn            | <b>0.83</b> | 0.40        | 0.17        | -0.06       | 0.30  |
| Fe            | <b>0.88</b> | 0.46        | 0.00        | 0.01        | Fe            | <b>0.99</b> | -0.04       | Fe            | <b>0.90</b> | 0.31        | 0.16        | 0.10        | 0.24  | Fe            | <b>0.93</b> | 0.11        | 0.18        | 0.12        | 0.26  | Fe            | <b>0.84</b> | 0.34        | 0.33        | 0.02        | 0.23  |
| Co            | 0.50        | 0.65        | 0.50        | -0.11       | Co            | <b>0.93</b> | 0.28        | Co            | <b>0.70</b> | 0.57        | 0.13        | 0.25        | 0.23  | Co            | <b>0.71</b> | 0.51        | 0.23        | 0.24        | 0.09  | Co            | <b>0.80</b> | 0.46        | 0.11        | -0.15       | 0.31  |
| Ni            | 0.23        | 0.28        | <b>0.86</b> | -0.07       | Ni            | <b>0.90</b> | 0.30        | Ni            | 0.49        | <b>0.85</b> | 0.11        | 0.11        | 0.04  | Ni            | 0.18        | 0.33        | <b>0.84</b> | 0.22        | 0.10  | Ni            | 0.64        | 0.48        | 0.32        | -0.32       | 0.14  |
| Cu            | 0.42        | <b>0.73</b> | 0.33        | 0.00        | Cu            | <b>0.95</b> | 0.00        | Cu            | 0.59        | 0.09        | 0.08        | -0.16       | 0.69  | Cu            | 0.42        | -0.34       | 0.50        | 0.59        | -0.25 | Cu            | 0.46        | 0.01        | <b>0.79</b> | -0.17       | -0.06 |
| Zn            | 0.63        | 0.38        | 0.34        | -0.16       | Zn            | <b>0.90</b> | 0.37        | Zn            | 0.51        | 0.35        | 0.42        | 0.39        | 0.35  | Zn            | 0.44        | 0.16        | 0.18        | <b>0.80</b> | 0.05  | Zn            | 0.15        | 0.27        | 0.19        | <b>0.82</b> | 0.14  |
| As            | 0.41        | 0.44        | 0.00        | 0.67        | As            | 0.63        | 0.11        | As            | <b>0.72</b> | 0.10        | 0.64        | 0.05        | 0.18  | As            | 0.34        | -0.15       | 0.37        | 0.27        | 0.67  | As            | -0.06       | -0.09       | 0.35        | -0.18       | -0.78 |
| Rb            | <b>0.96</b> | 0.17        | 0.10        | 0.06        | Rb            | <b>0.97</b> | 0.04        | Rb            | <b>0.95</b> | 0.25        | 0.11        | 0.09        | 0.06  | Rb            | <b>0.87</b> | 0.27        | 0.07        | 0.08        | 0.23  | Rb            | <b>0.89</b> | 0.37        | 0.00        | -0.09       | 0.23  |
| Sr            | <b>0.92</b> | 0.24        | 0.18        | 0.10        | Sr            | <b>0.94</b> | 0.17        | Sr            | <b>0.90</b> | 0.29        | 0.09        | 0.20        | 0.20  | Sr            | <b>0.85</b> | 0.09        | 0.46        | 0.13        | 0.00  | Sr            | <b>0.85</b> | 0.43        | 0.09        | 0.17        | 0.12  |
| Y             | 0.10        | -0.16       | -0.11       | <b>0.96</b> | Y             | <b>0.98</b> | 0.02        | Y             | <b>0.93</b> | 0.29        | 0.13        | 0.03        | 0.15  | Y             | <b>0.92</b> | -0.13       | -0.11       | 0.14        | -0.21 | Y             | <b>0.97</b> | 0.06        | 0.05        | 0.13        | 0.02  |
| Nb            | <b>0.88</b> | 0.39        | 0.01        | 0.17        | Nb            | <b>0.99</b> | 0.00        | Nb            | <b>0.88</b> | 0.22        | 0.19        | 0.10        | 0.29  | Nb            | <b>0.88</b> | -0.30       | 0.18        | 0.03        | 0.00  | Nb            | <b>0.86</b> | 0.39        | 0.10        | -0.11       | 0.21  |
| Mo            | <b>0.72</b> | 0.58        | 0.23        | -0.12       | Mo            | <b>0.95</b> | 0.12        | Mo            | 0.35        | 0.00        | 0.29        | -0.34       | 0.68  | Mo            | <b>0.74</b> | -0.34       | -0.02       | 0.40        | 0.14  | Mo            | -0.10       | 0.01        | <b>0.95</b> | -0.14       | -0.16 |
| Cd            | 0.67        | 0.14        | 0.50        | 0.15        | Cd            | <b>0.81</b> | 0.25        | Cd            | -0.16       | -0.01       | <b>0.97</b> | -0.14       | -0.02 | Cd            | -0.26       | -0.05       | 0.50        | <b>0.76</b> | 0.01  | Cd            | -0.31       | 0.16        | <b>0.83</b> | 0.26        | -0.10 |
| Sb            | <b>0.85</b> | 0.36        | -0.20       | 0.11        | Sb            | <b>0.98</b> | 0.06        | Sb            | 0.62        | 0.07        | 0.65        | 0.00        | 0.38  | Sb            | 0.08        | 0.04        | 0.30        | <b>0.93</b> | 0.12  | Sb            | 0.03        | -0.21       | <b>0.94</b> | 0.04        | 0.02  |
| Cs            | <b>0.83</b> | 0.10        | -0.03       | 0.52        | Cs            | <b>0.97</b> | 0.02        | Cs            | <b>0.95</b> | 0.18        | 0.23        | 0.12        | 0.06  | Cs            | <b>0.85</b> | 0.03        | 0.16        | 0.09        | 0.15  | Cs            | <b>0.93</b> | 0.32        | -0.03       | -0.06       | 0.00  |
| Ba            | <b>0.89</b> | 0.42        | -0.14       | -0.08       | Ba            | <b>0.99</b> | -0.10       | Ba            | <b>0.86</b> | 0.31        | 0.17        | 0.03        | 0.34  | Ba            | <b>0.87</b> | -0.21       | -0.05       | 0.20        | 0.21  | Ba            | 0.36        | -0.07       | <b>0.88</b> | 0.17        | 0.11  |
| La            | 0.29        | 0.25        | <b>0.84</b> | -0.13       | La            | 0.41        | <b>0.81</b> | La            | 0.60        | 0.21        | 0.00        | 0.68        | 0.22  | La            | 0.15        | <b>0.90</b> | -0.24       | 0.00        | -0.12 | La            | <b>0.75</b> | 0.58        | -0.04       | 0.28        | 0.02  |
| Ce            | <b>0.92</b> | 0.29        | 0.20        | -0.05       | Ce            | <b>0.98</b> | 0.14        | Ce            | <b>0.90</b> | 0.25        | 0.12        | 0.18        | 0.28  | Ce            | <b>0.94</b> | 0.13        | -0.01       | 0.06        | 0.04  | Ce            | <b>0.94</b> | 0.18        | 0.23        | 0.08        | 0.05  |
| Pr            | <b>0.95</b> | 0.18        | 0.15        | 0.15        | Pr            | <b>0.98</b> | 0.04        | Pr            | <b>0.94</b> | 0.25        | 0.11        | 0.14        | 0.12  | Pr            | <b>0.96</b> | 0.23        | -0.02       | 0.06        | 0.08  | Pr            | <b>0.97</b> | 0.22        | 0.07        | 0.05        | -0.06 |
| Nd            | <b>0.95</b> | 0.21        | 0.14        | 0.17        | Nd            | <b>0.99</b> | 0.03        | Nd            | <b>0.94</b> | 0.22        | 0.13        | 0.16        | 0.14  | Nd            | <b>0.96</b> | 0.17        | 0.04        | -0.01       | 0.02  | Nd            | <b>0.96</b> | 0.20        | 0.07        | 0.08        | -0.07 |
| Sm            | <b>0.85</b> | 0.21        | 0.41        | 0.15        | Sm            | <b>0.93</b> | 0.31        | Sm            | <b>0.94</b> | 0.21        | 0.09        | 0.20        | 0.07  | Sm            | 0.68        | 0.66        | -0.18       | 0.02        | -0.17 | Sm            | <b>0.92</b> | 0.33        | 0.12        | 0.09        | -0.01 |
| Eu            | <b>0.92</b> | 0.36        | -0.02       | -0.08       | Eu            | <b>0.99</b> | -0.07       | Eu            | <b>0.90</b> | 0.27        | 0.11        | 0.01        | 0.26  | Eu            | <b>0.93</b> | -0.23       | -0.03       | 0.19        | -0.14 | Eu            | 0.68        | 0.14        | 0.61        | 0.27        | -0.16 |
| Dy            | <b>0.93</b> | 0.22        | 0.09        | 0.17        | Dy            | <b>0.99</b> | 0.04        | Dy            | <b>0.92</b> | 0.33        | 0.15        | 0.03        | 0.11  | Dy            | <b>0.93</b> | 0.04        | -0.05       | 0.01        | -0.24 | Dy            | <b>0.90</b> | 0.14        | 0.16        | 0.18        | -0.25 |
| Ho            | <b>0.98</b> | 0.07        | 0.10        | 0.07        | Ho            | <b>0.96</b> | -0.06       | Ho            | <b>0.98</b> | 0.08        | 0.08        | 0.02        | 0.03  | Ho            | <b>0.94</b> | 0.21        | 0.12        | 0.07        | -0.13 | Ho            | <b>0.95</b> | 0.07        | 0.01        | -0.24       | 0.01  |
| Pb            | 0.61        | 0.58        | 0.13        | 0.10        | Pb            | <b>0.93</b> | 0.16        | Pb            | 0.42        | 0.24        | <b>0.84</b> | -0.01       | 0.12  | Pb            | -0.04       | -0.15       | <b>0.91</b> | 0.23        | 0.13  | Pb            | 0.50        | <b>0.76</b> | 0.31        | 0.05        | 0.15  |
| Eigenvalue    | 25.08       | 1.39        | 3.96        | 2.14        | Eigenvalue    | 29.25       | 2.94        | Eigenvalue    | 26.09       | 1.41        | 1.88        | 3.24        | 1.05  | Eigenvalue    | 19.25       | 5.99        | 4.33        | 1.43        | 1.22  | Eigenvalue    | 23.31       | 2.17        | 5.05        | 1.41        | 1.06  |
| % of variance | 58.84       | 14.34       | 13.62       | 6.28        | % of variance | 82.50       | 9.46        | % of variance | 60.08       | 11.45       | 9.55        | 8.59        | 6.55  | % of variance | 51.03       | 16.20       | 10.93       | 9.66        | 4.24  | % of variance | 55.08       | 15.84       | 14.99       | 4.24        | 4.13  |

**Table S3. Principal component loadings (VARIMAX normalized) of select metal and trace elements in quasi-UFP ( $d_p < 0.25 \mu\text{m}$ ) at sites' clusters, including a) Long Beach (HUD), b) Los Angeles (GRD, LDS, CCL, USC, HMS, FRE), c) Riverside (VBR, GRA) and d) Lancaster (LAN).**

| Long Beach(HUD) |             |             |             | Los Angeles (GRD, LDS, CCL, USC, HMS, FRE) |             |             |             | Riverside(VBR, GRA) |               |             |             |             | Lancaster   |       |               |             |             |             |             |       |
|-----------------|-------------|-------------|-------------|--------------------------------------------|-------------|-------------|-------------|---------------------|---------------|-------------|-------------|-------------|-------------|-------|---------------|-------------|-------------|-------------|-------------|-------|
|                 | PC1         | PC2         | PC3         |                                            | PC1         | PC2         | PC3         | PC4                 |               | PC1         | PC2         | PC3         | PC4         | PC5   |               | PC1         | PC2         | PC3         | PC4         | PC5   |
| Li              | <b>0.97</b> | 0.14        | -0.09       | Li                                         | <b>0.91</b> | 0.11        | 0.09        | 0.08                | Li            | <b>0.86</b> | 0.32        | -0.07       | 0.12        | -0.31 | Li            | <b>0.90</b> | 0.35        | 0.01        | -0.13       | 0.13  |
| Na              | <b>0.88</b> | 0.29        | 0.15        | Na                                         | <b>0.73</b> | 0.33        | 0.38        | 0.21                | Na            | 0.55        | 0.18        | 0.56        | 0.53        | -0.04 | Na            | 0.58        | <b>0.74</b> | -0.12       | 0.19        | 0.13  |
| Mg              | <b>0.99</b> | 0.09        | 0.03        | Mg                                         | <b>0.95</b> | 0.14        | 0.09        | 0.12                | Mg            | <b>0.94</b> | 0.06        | 0.23        | 0.19        | 0.00  | Mg            | <b>0.91</b> | 0.33        | -0.04       | 0.17        | 0.03  |
| Al              | <b>0.99</b> | 0.08        | 0.12        | Al                                         | <b>0.92</b> | 0.19        | 0.12        | 0.12                | Al            | <b>0.94</b> | 0.09        | 0.14        | 0.19        | 0.03  | Al            | <b>0.95</b> | 0.20        | 0.07        | 0.15        | -0.07 |
| S               | -0.51       | 0.50        | <b>0.53</b> | S                                          | -0.08       | <b>0.92</b> | 0.10        | 0.02                | S             | 0.11        | -0.05       | <b>0.94</b> | -0.01       | -0.14 | S             | 0.29        | <b>0.88</b> | -0.22       | 0.18        | -0.09 |
| K               | <b>0.95</b> | 0.18        | 0.14        | K                                          | <b>0.93</b> | 0.15        | 0.05        | 0.01                | K             | <b>0.89</b> | 0.06        | 0.26        | 0.29        | 0.03  | K             | <b>0.77</b> | 0.46        | 0.06        | -0.08       | 0.36  |
| Ca              | <b>0.98</b> | 0.13        | 0.05        | Ca                                         | <b>0.97</b> | 0.08        | 0.11        | 0.09                | Ca            | <b>0.93</b> | 0.05        | 0.04        | 0.27        | 0.22  | Ca            | <b>0.94</b> | 0.18        | -0.02       | 0.11        | 0.04  |
| Ti              | <b>0.99</b> | 0.02        | 0.02        | Ti                                         | <b>0.92</b> | -0.05       | 0.19        | 0.05                | Ti            | <b>0.89</b> | 0.15        | 0.11        | 0.22        | 0.27  | Ti            | <b>0.84</b> | 0.41        | 0.06        | -0.09       | 0.31  |
| V               | -0.09       | 0.06        | <b>0.91</b> | V                                          | -0.15       | <b>0.83</b> | -0.04       | -0.03               | V             | -0.02       | -0.06       | <b>0.93</b> | 0.06        | -0.06 | V             | 0.56        | <b>0.73</b> | -0.28       | 0.00        | 0.06  |
| Cr              | <b>0.79</b> | 0.12        | 0.30        | Cr                                         | 0.17        | -0.10       | <b>0.96</b> | -0.01               | Cr            | 0.44        | 0.13        | -0.06       | <b>0.87</b> | 0.03  | Cr            | 0.47        | <b>0.59</b> | 0.47        | -0.05       | -0.02 |
| Mn              | <b>0.98</b> | 0.14        | 0.06        | Mn                                         | <b>0.95</b> | -0.04       | 0.22        | 0.08                | Mn            | <b>0.84</b> | 0.13        | 0.13        | 0.15        | 0.38  | Mn            | <b>0.83</b> | 0.40        | 0.17        | -0.06       | 0.30  |
| Fe              | <b>0.98</b> | 0.12        | 0.07        | Fe                                         | <b>0.94</b> | -0.14       | 0.27        | -0.01               | Fe            | <b>0.90</b> | 0.16        | 0.11        | 0.24        | 0.28  | Fe            | <b>0.84</b> | 0.34        | 0.33        | 0.02        | 0.23  |
| Co              | 0.52        | 0.67        | 0.22        | Co                                         | <b>0.82</b> | 0.18        | 0.30        | 0.00                | Co            | <b>0.72</b> | 0.15        | 0.32        | 0.49        | 0.25  | Co            | <b>0.80</b> | 0.46        | 0.11        | -0.15       | 0.31  |
| Ni              | 0.45        | 0.14        | <b>0.80</b> | Ni                                         | 0.12        | 0.36        | <b>0.89</b> | 0.01                | Ni            | 0.47        | 0.20        | 0.18        | <b>0.83</b> | 0.09  | Ni            | 0.64        | 0.48        | 0.32        | -0.32       | 0.14  |
| Cu              | 0.69        | -0.15       | 0.44        | Cu                                         | 0.69        | -0.15       | 0.27        | -0.05               | Cu            | 0.26        | 0.48        | -0.21       | 0.15        | 0.66  | Cu            | 0.46        | 0.01        | <b>0.79</b> | -0.17       | -0.06 |
| Zn              | 0.58        | 0.62        | 0.11        | Zn                                         | <b>0.87</b> | 0.27        | 0.02        | -0.08               | Zn            | 0.51        | 0.49        | 0.28        | 0.22        | 0.34  | Zn            | 0.15        | 0.27        | 0.19        | <b>0.82</b> | 0.14  |
| As              | <b>0.79</b> | 0.22        | -0.22       | As                                         | 0.62        | 0.00        | 0.07        | 0.51                | As            | 0.54        | 0.60        | 0.01        | 0.06        | 0.30  | As            | -0.06       | -0.09       | 0.35        | -0.18       | -0.78 |
| Rb              | <b>0.99</b> | 0.05        | 0.08        | Rb                                         | <b>0.96</b> | 0.03        | 0.09        | 0.09                | Rb            | <b>0.97</b> | 0.09        | 0.09        | 0.17        | -0.02 | Rb            | <b>0.89</b> | 0.37        | 0.00        | -0.09       | 0.23  |
| Sr              | <b>0.99</b> | 0.09        | -0.01       | Sr                                         | <b>0.86</b> | -0.08       | 0.12        | -0.05               | Sr            | <b>0.85</b> | 0.18        | 0.17        | 0.28        | 0.30  | Sr            | <b>0.85</b> | 0.43        | 0.09        | 0.17        | 0.12  |
| Y               | <b>0.96</b> | 0.09        | -0.03       | Y                                          | 0.06        | -0.05       | -0.04       | <b>0.92</b>         | Y             | <b>0.91</b> | 0.04        | -0.03       | 0.16        | 0.29  | Y             | <b>0.97</b> | 0.06        | 0.05        | 0.13        | 0.02  |
| Nb              | <b>0.97</b> | 0.10        | 0.17        | Nb                                         | <b>0.92</b> | -0.14       | 0.22        | 0.06                | Nb            | <b>0.81</b> | 0.16        | -0.03       | 0.16        | 0.44  | Nb            | <b>0.86</b> | 0.39        | 0.10        | -0.11       | 0.21  |
| Mo              | <b>0.93</b> | 0.10        | 0.22        | Mo                                         | 0.69        | -0.11       | 0.58        | -0.06               | Mo            | 0.39        | 0.25        | -0.27       | -0.07       | 0.65  | Mo            | -0.10       | 0.01        | <b>0.95</b> | -0.14       | -0.16 |
| Cd              | <b>0.78</b> | 0.35        | 0.07        | Cd                                         | <b>0.83</b> | 0.24        | -0.05       | 0.12                | Cd            | -0.16       | <b>0.94</b> | -0.11       | 0.06        | -0.07 | Cd            | -0.31       | 0.16        | <b>0.83</b> | 0.26        | -0.10 |
| Sb              | <b>0.98</b> | 0.02        | 0.04        | Sb                                         | <b>0.85</b> | -0.21       | 0.16        | 0.03                | Sb            | 0.37        | <b>0.82</b> | 0.07        | 0.06        | 0.31  | Sb            | 0.03        | -0.21       | <b>0.94</b> | 0.04        | 0.02  |
| Cs              | <b>0.98</b> | 0.00        | -0.01       | Cs                                         | <b>0.81</b> | 0.02        | 0.26        | 0.31                | Cs            | <b>0.95</b> | 0.20        | 0.07        | 0.12        | 0.08  | Cs            | <b>0.93</b> | 0.32        | -0.03       | -0.06       | 0.00  |
| Ba              | <b>0.97</b> | 0.18        | 0.01        | Ba                                         | <b>0.93</b> | -0.20       | 0.19        | -0.07               | Ba            | <b>0.81</b> | 0.14        | 0.01        | 0.20        | 0.48  | Ba            | 0.36        | -0.07       | <b>0.88</b> | 0.17        | 0.11  |
| La              | 0.01        | <b>0.91</b> | 0.03        | La                                         | 0.42        | <b>0.81</b> | 0.10        | -0.08               | La            | 0.43        | -0.10       | <b>0.81</b> | 0.08        | 0.11  | La            | <b>0.75</b> | 0.58        | -0.04       | 0.28        | 0.02  |
| Ce              | <b>0.98</b> | 0.19        | 0.01        | Ce                                         | <b>0.92</b> | 0.11        | 0.08        | -0.06               | Ce            | <b>0.92</b> | 0.07        | 0.15        | 0.18        | 0.26  | Ce            | <b>0.94</b> | 0.18        | 0.23        | 0.08        | 0.05  |
| Pr              | <b>0.98</b> | 0.09        | 0.12        | Pr                                         | <b>0.91</b> | 0.06        | 0.06        | 0.06                | Pr            | <b>0.96</b> | 0.07        | 0.14        | 0.18        | 0.10  | Pr            | <b>0.97</b> | 0.22        | 0.07        | 0.05        | -0.06 |
| Nd              | <b>0.98</b> | 0.09        | 0.07        | Nd                                         | <b>0.97</b> | 0.05        | 0.11        | 0.09                | Nd            | <b>0.97</b> | 0.07        | 0.12        | 0.15        | 0.09  | Nd            | <b>0.96</b> | 0.20        | 0.07        | 0.08        | -0.07 |
| Sm              | <b>0.90</b> | 0.33        | 0.19        | Sm                                         | <b>0.89</b> | 0.32        | 0.11        | 0.10                | Sm            | <b>0.91</b> | 0.04        | 0.32        | 0.14        | 0.07  | Sm            | <b>0.92</b> | 0.33        | 0.12        | 0.09        | -0.01 |
| Eu              | <b>0.98</b> | 0.14        | 0.02        | Eu                                         | <b>0.95</b> | -0.11       | 0.11        | -0.04               | Eu            | <b>0.93</b> | 0.06        | -0.08       | 0.17        | 0.23  | Eu            | 0.68        | 0.14        | 0.61        | 0.27        | -0.16 |
| Dy              | <b>0.98</b> | 0.10        | 0.09        | Dy                                         | <b>0.94</b> | 0.05        | 0.14        | 0.14                | Dy            | <b>0.94</b> | 0.06        | 0.02        | 0.25        | 0.10  | Dy            | <b>0.90</b> | 0.14        | 0.16        | 0.18        | -0.25 |
| Ho              | <b>0.97</b> | -0.02       | 0.06        | Ho                                         | <b>0.90</b> | -0.02       | 0.14        | 0.08                | Ho            | <b>0.97</b> | 0.08        | 0.04        | 0.05        | 0.01  | Ho            | <b>0.95</b> | 0.07        | 0.01        | -0.24       | 0.01  |
| Pb              | <b>0.98</b> | 0.06        | 0.14        | Pb                                         | <b>0.89</b> | -0.04       | 0.09        | 0.08                | Pb            | 0.12        | <b>0.79</b> | -0.11       | 0.32        | 0.12  | Pb            | 0.50        | <b>0.76</b> | 0.31        | 0.05        | 0.15  |
| Eigenvalue      | 27.646      | 1.601       | 2.658       | Eigenvalue                                 | 23.83       | 2.99        | 2.02        | 1.27                | Eigenvalue    | 23.33       | 2.54        | 3.85        | 1.40        | 1.10  | Eigenvalue    | 23.31       | 2.17        | 5.05        | 1.41        | 1.06  |
| % of variance   | 76.849      | 7.503       | 6.806       | % of variance                              | 65.16       | 8.62        | 8.19        | 4.06                | % of variance | 56.50       | 10.08       | 9.92        | 8.42        | 7.16  | % of variance | 55.08       | 15.84       | 14.99       | 4.24        | 4.13  |
